# Supplementary material for: R-loops induce repressive chromatin marks over mammalian gene terminators
Source: Springer Nature journal article supplement (doi:10.1038/nature13787), 2014-10-03
Supplement: 41586_2014_BFnature13787_MOESM11_ESM.pdf [file 41586_2014_BFnature13787_MOESM11_ESM.pdf]

**Table 1: Oligonucleotides**

| Name                                       | Sequence (5'→ 3')           |
|--------------------------------------------|-----------------------------|
| <b>Human <math>\beta</math>-actin gene</b> |                             |
| prom (F)                                   | GAG GGG AGA GGG GGT AAA     |
| prom (R)                                   | AGC CAT AAA AGG CAA CTT TCG |
| in1 (F)                                    | CGG GGT CTT TGT CTG AGC     |
| in1 (R)                                    | CAG TTA GCG CCC AAA GGA C   |
| in3 (F)                                    | TAA CAC TGG CTC GTG TGA CAA |
| in3 (R)                                    | AAG TGC AAA GAA CAC GGC TAA |
| in5 (F),                                   | GGA GCT GTC ACA TCC AGG GTC |
| in5 (R)                                    | TGC TGA TCC ACA TCT GCT GG  |
| 5'pause (F)                                | TTA CCC AGA GTG CAG GTG TG  |
| 5'pause (R)                                | CCC CAA TAA GCA GGA ACA GA  |
| pause (F)                                  | GGG ACT ATT TGG GGG TGT CT  |
| pause (R)                                  | TCC CAT AGG TGA AGG CAA AG  |
| C (F)                                      | TGG GCC ACT TAA TCA TTC AAC |
| C (R)                                      | CCT CAC TTC CAG ACT GAC AGC |
| D (F)                                      | CAG TGG TGT GGT GTG ATC TTG |
| D (R)                                      | GGC AAA ACC CTG TAT CTG TGA |
| <b>Human Ensa gene</b>                     |                             |
| prom (F)                                   | GAT AGG GCA ATG ACG TAA CGA |
| prom (R)                                   | GGC TCA CTC TCT TTC CAG GTT |
| 3' end (F)                                 | TCT GCC TGT ATT TGT GTG CTG |
| 3' end (R)                                 | GCA GCC CTC GTC TGT ATA ATG |
| <b>Human Gemin7 gene</b>                   |                             |
| prom (F)                                   | TCG GTG AGT ACA AGG TGG TG  |
| prom (R)                                   | TAC CTC TTT CCG TCA CTC AGG |
| 3' end (F)                                 | GAC TGC ACA CGA CAG CAG AT  |
| 3' end (R)                                 | GAA TCC TCG GCC TTT TAT CAG |
| <b>Human Cyclin B1 gene</b>                |                             |
| in3 (F)                                    | CTT GGA AGG CCC ATA CTG ATT |
| in3 (R)                                    | GGA GTT GAT GCT TGA GCT GTT |
| 3' end 1 (F)                               | CAG TTT CAC CAT GTT GGT CAG |

|                                            |                                    |
|--------------------------------------------|------------------------------------|
| 3' end 1 (R)                               | ACA GTA AAT TGG CCA GGT GTG        |
| 3' end 2 (F)                               | CCT CCC AGG TTC AAG TGA TTC        |
| 3' end 2 (R)                               | TGA GAC CAT CCT GGC TAA CAC        |
|                                            |                                    |
| <b>Human Akirin 1 gene</b>                 |                                    |
| in3 (F)                                    | GGC ATT ACA GGA GTG CTA CAC A      |
| in3 (R)                                    | AAT GGC CTA CTC AAT GCC TTC        |
| 3' end 1 (F)                               | ACT GCG TGG TTG TAG CTC TGT        |
| 3' end 1 (R)                               | GGT AAG CAA GCC ATG TTT CAG        |
| 3' end 2 (F)                               | TGT CTG TGG CAG TTT TCA CAC        |
| 3' end 2 (R)                               | GGC CAG CAC ACT TTT CTG TAA        |
|                                            |                                    |
| <b>Human centromere 9</b>                  |                                    |
| cen9 (F)                                   | CCT ATG ATG AAA AAG GTA ATA TCT TC |
| cen9 (R)                                   | CTG AAA GCG CTT AAA ACG TCC        |
|                                            |                                    |
| <b>Mouse <math>\beta</math>-actin gene</b> |                                    |
| prom (F)                                   | GAG GGG AGA GGG GGT AAA            |
| prom (R)                                   | GAA GCT GTG CTC GCG G              |
| in1 (F)                                    | TAG GGT CGC GGT GTG                |
| in1 (R)                                    | GGT TCC CAA TAC TGT GTA CTC        |
| in3 (F)                                    | AAG TGG CCT TGG AGT GTG            |
| in3 (R)                                    | CAA GGA GTG CAA GAA CAC AGC        |
| in5 (F)                                    | CAC CAT TCA CCA TCT TGT C          |
| in5 (R)                                    | TGA TCC ACA TCT GCT GG             |
| pause (F)                                  | AGG TTG GGT GGG TGT                |
| pause (R)                                  | AGA CTT CAT TAA AGG GCC TGT        |
| pause2 (F)                                 | CAG GAA GGT GTG AAG CCTA TGG       |
| pause2 (R)                                 | GGG CTG ATT TCC AGG A              |
| C (F)                                      | TCA GGC TGG GCA CTA TAG            |
| C (R)                                      | CAG TTC TGG CTG TCT TGG            |
| D (F)                                      | TCG GTG AGT GGT CTA ATA AGC        |
| D (R)                                      | AGA TGG AGG AGG GAA C              |
| E (F)                                      | ACA ATC ACA CTG GGG GAA AA         |
| E (R)                                      | CTC AGG ACC CCA CAT AAT GG         |
| F (F)                                      | ACG GTG GGG TAG TAA ATC TGG        |
| F (R)                                      | CTG CCT AAA ACT CCA AGG TCC        |
|                                            |                                    |
| <b>Mouse major satellites</b>              |                                    |
| majsat (F)                                 | AAA TAC ACA CTT TAG GAC G          |
| majsat (R)                                 | TCA AGT GGA TGT TTC TCA TT         |
